# Supplementary material for: Digital health literacy intervention to support maternal, child and family health in primary healthcare settings of Pakistan during the age of coronavirus: study protocol for a randomised controlled trial
Source: HighWire-hosted journal article supplement (doi:10.1136/bmjopen-2020-045163), 2021-03-01
Supplement: bmjopen-2020-045163supp002_data_supplement.pdf [file bmjopen-2020-045163supp002_data_supplement.pdf]

## Informed Cover letter and Consent for Intervention

### CONTROL GROUP

**Thank you** for your valuable time.

We request you to participate in a research project that will benefit you and your family with regard to your health and wellbeing. As you know Coronavirus is preventing you from meeting with your LHW. Thus, we are bringing community healthcare workers to you with a mobile device and internet to provide you with health services.

This study will require you to complete a baseline survey and a pre and post-test survey. We will also provide you with a health literacy booklet. A suitable time will be taken from you for meeting and no information you share with us will be communicated or disseminated. All anonymity and confidentiality will be maintained.

Digital Sign or Button/Tab for  
CONSENT

Sara Rizvi Jafree, PhD

Principal Research Investigator

Assistant Professor, Forman Christian College\ University

E-mail: [sarajafree@fccollege.edu.pk](mailto:sarajafree@fccollege.edu.pk)

Cell: 0300 400 5740

### Experiment GROUP

**Thank you** for your valuable time.

We request you to participate in a research project that will benefit you and your family with regard to your health and wellbeing. As you know Coronavirus is preventing you from meeting with your LHW. Thus, we are bringing community healthcare workers to you with a mobile device and internet to provide you with health services.

This study will require you to complete a baseline survey and a pre and post-test survey. We will also provide you with a health literacy booklet. A suitable time will be taken from you for meeting and no information you share with us will be communicated or disseminated. All anonymity and confidentiality will be maintained.

In addition, the research includes a three month intervention, which has been designed to support you in key areas for your health: (i) hygiene and sanitation and (ii) coronavirus awareness and prevention.

There will be weekly one-one engagement with your community healthcare worker, and also a monthly group engagement with your community women. You may opt to withdraw at any point during this intervention. If you have need for further questions and clarifications at any time, please contact us at any time.

Thank you for your time and we look forward to working together on this project to improve your health and wellbeing.

Digital Sign or Button/Tab for  
CONSENT

Sara Rizvi Jafree, PhD

Principal Research Investigator

Assistant Professor, Forman Christian College\ University

E-mail: [sarajafree@fccollege.edu.pk](mailto:sarajafree@fccollege.edu.pk)

Cell: 0300 400 5740

کنٹرول گروپ

آپ کے قیمتی وقت کا شکریہ

ہم آپ سے ایک تحقیقی منصوبے میں شرکت کرنے کی درخواست کرتے ہیں جو آپ اور آپ کے خاندان کی صحت اور خوشحالی کے سلسلے میں فائدہ مند گی۔ جیسا کہ آپ جانتی ہیں کہ کرونا کی وجہ سے آپ اپنی ہیلتھ ورکر سے مل نہیں سکتیں ہم آپ کو صحت کی خدمات فراہم کرنے کے لئے کمیونٹی کارکنوں کو لا رہے ہیں ان کے پاس موبائل اور انٹرنیٹ کی سہولت ہے۔ اس مطالعہ کے دوران آپ کو ایک بیس سروے اور پری اور پوسٹ ٹیسٹ سروے کو مکمل کرنے کی ضرورت ہوگی۔ ہم آپ کو صحت خواندگی کتابچہ بھی فراہم کریں گے۔ اس سلسلہ میں آپ سے ہونے والی ملاقات اور اس سے حاصل ہونے والی معلومات کو صیغائے راز میں رکھا جائے گا۔

دستخط یا ہٹن دیا کر رضا مندی کا اضمبار

سارہ رضوی جعفری

بنیادی محقق

اسٹنٹ پروفیسر فورمن کرسچین کالج و یونیورسٹی

ای میل : [sarajafree@fccollege.edu.pk](mailto:sarajafree@fccollege.edu.pk)

موبائل: 0300 400 5740

تجرباتی گروپ

آپ کے قیمتی وقت کا شکریہ

ہم آپ سے ایک تحقیقی منصوبے میں شرکت کرنے کی درخواست کرتے ہیں جو آپ اور آپ کے خاندان کی صحت اور خوشحالی کے سلسلے میں فائدہ مند گی۔ جیسا کہ آپ جانتی ہیں کہ کرونا کی وجہ سے آپ اپنی ہیلتھ ورکر سے مل نہیں سکتیں ہم آپ کو صحت کی خدمات فراہم کرنے کے لئے کمیونٹی کارکنوں کو لا رہے ہیں ان کے پاس موبائل اور انٹرنیٹ کی سہولت ہے۔ اس مطالعہ کے دوران آپ کو ایک بیس سروے اور پری اور پوسٹ ٹیسٹ سروے کو مکمل کرنے کی ضرورت ہوگی۔ ہم آپ کو صحت خواندگی کتابچہ بھی فراہم کریں گے۔ اس سلسلے میں آپ سے ہونے والی ملاقات اور اس سے حاصل ہونے والی معلومات کو صیغائے راز میں رکھا جائے گا۔

اس کے علاوہ، تحقیق میں ایک تین ماہ کی مداخلت بھی شامل ہے جس کو آپ کی صحت کے اہم معاملات میں آپ کی مدد کرنے کے لئے ڈیزائن کیا گیا ہے جیسے (1) حفظان صحت و صفائی (2) کرونا وائرس سے بچاؤ اور حفاظت وغیرہ۔

اس سلسلے میں آپ کی اپنی کمیونٹی ہیلتھ ورکر سے ہفتہ وار انفرادی ملاقات ہو گی علاوہ ازیں علاقہ کی اور خواتین کے ساتھ ماہانہ اجتماعی ملاقات بھی ہوگی۔ آپ اس مداخلت کے دوران کسی بھی وقت شرکت سے انکار کر سکتی ہیں۔ اور اگر آپ کوئی سوال پوچھنا چاہیں تو ہم سے کسی بھی وقت پوچھ سکتی ہیں۔

ہم آپ کی صحت اور خوشحالی کو بہتر بنانے کے لئے اس منصوبے پر مل کر کام کرنے کے لیے پر جوش ہیں۔ شکریہ

دستخط یا ہتھ دبا کر رضا مندی کا اظہار

سارہ رضوی جعفری

بنیادی محقق

اسٹنٹ پروفیسر فورمن کرسچین کالج و یونیورسٹی

ای میل: [sarajafree@fccollege.edu.pk](mailto:sarajafree@fccollege.edu.pk)

موبائل: 0300 400 5740
