# Supplementary material for: Digital health literacy intervention to support maternal, child and family health in primary healthcare settings of Pakistan during the age of coronavirus: study protocol for a randomised controlled trial
Source: HighWire-hosted journal article supplement (doi:10.1136/bmjopen-2020-045163), 2021-03-01
Supplement: bmjopen-2020-045163supp007_data_supplement.pdf [file bmjopen-2020-045163supp007_data_supplement.pdf]

## Appendix E

### Content guide for community health workers for health literacy training for hygiene and sanitation

#### Guide for weekly & Monthly meetings

##### Tips to keep house clean

- Clean and mop the house daily
- Add Dettol or any disinfectant in water while mopping the house
- Clean washroom/Toilet with disinfectant everyday
- Do away with the trash and impurities
- Cover up the trash carefully or dispense it with the garbage collector.
- Check your bedsheet before spreading it on the bed.
- Put out your comforters, bedspread and quilts out in the sunlight from time to time
- Wash your hands with soap after doing chores.

##### Tips to keep kitchen area clean

- Clean your utensils and pots every time you use them
- Keep your washed pots covered
- Wash the cloth you use to clean the kitchen
- Secure the peels from vegetables and other trash
- Keep kitchen dry
- Please keep your wok and the seat clean at all times.
- Use sprays to keep the kitchen clear of mosquitoes and insects
- Tips to observe food hygiene
- Use different set of cups, plates and spoons for family members
- Boil the water before using it
- Eat freshly prepared food every day.
- Keep water and food covered
- Heat up the food before eating
- Avoid street food
- Wash vegetables and fruits before eating-
- Do not consume left over food.
- Keep edible food away from the trash can.
- Secure the leftovers properly and store an airy place

##### Tips for Personal hygiene

- Take shower daily and use soap
- Wash your hands before and after eating with soap
- Wash your hands before touching anything, e.g: before and after ironing, preparing food, entering the house, meeting someone upon your return to the house etc.
- Wash your clothes upon your return to home.
- Use washed towel and wash towels in disinfectants
- Put out the towel in sunlight to dry

- Keep a separate towel for every family member
- Keep a separate bed, quilt and pillow for every member of the family
- Do not use clothes without washing
- Wash your bed linen with disinfectants
- Brush your teeth daily or use “Miskak”
- Clip your nails weekly and keep them clean
- Take shower daily and keep your hair clean

#### Tips for illness and its treatment

- Consult doctor before using medicine
- Keep medicine in a dry and cold place
- Do not take food on empty stomach
- Keep medicines away from the reach of children
- Avoid unnecessary gaps in taking medicine
- Rest properly and eat well.
- Before taking medicine check its expiry date

گڈی باجیوں کے لئے حفظان صحت سے متعلق مواد

(بفتمہ وار انفرادی اور ماہانہ گروپ ملاقات کے لئے)

#### گھر کی صفائی

روزانہ گھر میں جھاڑو پوچا کریں۔

پوچا لگاتے وقت پانی میں ڈیٹول یا جراثیم کش دوا شامل کریں۔

باتھ روم اور بیت الخلا کو جراثیم کش دوا سے صاف کرنا

کچرے کو ٹھکانے لگائیں اور مکان کے فضلہ کا انتظام کریں

کچرے کو ڈھانپ کر کچرا جمع کرنے کے مقام پر رکھیں یا کچرا جمع کرنے والے کو دیں

چادریں جھاڑ کر بچھائیں۔

گدے کمبل اور رضائیوں کو دھوپ لگوائیں

اس کام کو مکمل کر کے صابن کے ساتھ اچھی طرح ہاتھ منہ دھوئیں۔

#### کچن کی صفائی

کھانے اور پینے کے برتن اور چمچوں کو ہر بار استعمال کے بعد صابن سے دھوئیں۔

دھونے کے بعد برتنوں کو ڈھانپ کر رکھیں۔

کچن میں استعمال ہونے والے کپڑوں کو روزانہ دھوئیں اور دھوپ میں سکھائیں۔

سبزی کے چھلکوں اور دیگر کوڑے کو ڈھانپ کر رکھیں اور جلد از جلد ٹھکانے لگائیں۔

کچن میں پانی کھڑا نہ ہونے دیں۔

چولہ اور اس کی چوکی صاف رکھیں۔

باورچی خانے کو مکھی مچھر اور دیگر کیڑے مکوڑوں سے پاک رکھیں۔

### خوراک کی صفائی

گھریلو افراد کے لئے پینے کے کپ ، پلیٹ اور چمچ کو الگ کریں۔

پینے سے پہلے پانی کا ابالیں۔

روزانہ تازہ کھانا تیار کریں۔

کھانے اور پانی کو ڈھانپ کر رکھیں۔

کھانا گرم کر کے کھائیں۔

بازار کے کھانے سے پرہیز کریں۔

پھل اور سبزیاں دھو کر استعمال کریں۔

خوراک کو کچرے کے ڈبے سے دور رکھیں۔

اگر کھانا بچ جائے تو ڈھانپ کر ہوادار جگہ پر رکھیں۔

ایک دوسرے کا جوٹھا کھانا نہ کھائیں۔

### زاتی صفائی

صابن سے روزانہ نہانا

کھانے سے پہلے اور بعد میں ہاتھ دھویں

کسی بھی چیز کو چھونے سے پہلے اور بعد میں ہاتھ دھونا جیسے کپڑے استری کرنا ، کھانا تیار کرنے سے پہلے ، گھر لوٹنے کے بعد ، ہاتھ چھونے / ملانے کے بعد وغیرہ

کپڑے دھوئیں اور جراثیم کشی کرنی خاص طور پر جب کپڑے باہر پہنے ہوں۔

تولیے دھونا اور جراثیم کش دوا سے صاف کریں۔

استعمال کے بعد پولیے کو دھوپ میں سکھائیں۔

خاندان کے ہر فرد کے لئے تولیے الگ کریں۔

گھر کے ہر فرد کے لیے بستر ، چادر ، کمبل ، اور تکیہ الگ مقرر کریں۔

بنا دھوئے ایک دوسرے کے کپڑے استعمال نہ کریں۔

بستر کی چادریں دھونا ، جراثیم سے پاک کریں۔

دانتوں کو برش یا مسواک کرنا اور منہ کی صفائی کریں۔

ناخن صاف کرنا اور ہفتہ وار تراشیں۔

باقاعدگی سے نہائیں اور سر کو صاف رکھیں۔

**بیماری اور دوا کا استعمال**

دوا ڈاکٹر کے مشورے سے استعمال کریں۔

دوا ٹھنڈی اور خشک جگہ پر رکھیں۔

دوا خالی پیٹ استعمال نہ کریں۔

دوا بچوں کی پہنچ سے دور رکھیں۔

دوا میں ناغہ نہ کریں۔

آرام اور خوراک کا خیال رکھیں۔

گھر میں پڑی دوا کو اس کی معیاد جانے بغیر استعمال نہ کریں۔
